# Supplementary material
Source: ML conference proceedings conference paper supplement (https://proceedings.mlr.press/v33/gopalan14.html)
Supplement: Supplementary file [file gopalan14-supp.pdf]

---

# Supplementary Material: Bayesian Nonparametric Poisson Factorization for Recommendation Systems:

---

**Prem Gopalan**  
Princeton University

**Francisco J. R. Ruiz**  
University Carlos III in Madrid

**Rajesh Ranganath**  
Princeton University

**David M. Blei**  
Princeton University

## 1 Expected inner product

We show here that the expected value of the inner product  $\boldsymbol{\theta}_u^\top \boldsymbol{\beta}_i$  is finite:

$$\begin{aligned}
 \mathbb{E}_{\boldsymbol{\theta}_u, \boldsymbol{\beta}_i} [\boldsymbol{\theta}_u^\top \boldsymbol{\beta}_i] &= \mathbb{E}_{\boldsymbol{\theta}_u, \boldsymbol{\beta}_i} \left[ \sum_{k=1}^{\infty} \beta_{ik} \theta_{uk} \right] \\
 &= \mathbb{E}_{\boldsymbol{\theta}_u} \left[ \sum_{k=1}^{\infty} \theta_{uk} \mathbb{E}_{\boldsymbol{\beta}_i} [\beta_{ik}] \right] \\
 &= \mathbb{E}_{\boldsymbol{\theta}_u} \left[ \sum_{k=1}^{\infty} \theta_{uk} \frac{a}{b} \right] \\
 &= \frac{a}{b} \mathbb{E}_{\boldsymbol{\theta}_u} \left[ \sum_{k=1}^{\infty} \theta_{uk} \right],
 \end{aligned} \tag{1}$$

since each  $\beta_{ik}$  is independent and identically distributed as a Gamma with shape  $a$  and rate  $b$ . The subscript of each expectation indicates the variables over which the expectation applies.

In order to compute the expectation  $\mathbb{E}_{\boldsymbol{\theta}_u} [\sum_{k=1}^{\infty} \theta_{uk}]$ , we apply Campbell's theorem (Kingman, 1993), and take into account that the Poisson process intensity of the Gamma process  $\text{GP}(c, H)$  is given by  $H \times \nu(d\theta)$ , where

$$\nu(d\theta) = \theta^{-1} \exp(-c\theta) d\theta. \tag{2}$$

Therefore, we have:

$$\begin{aligned}
 \mathbb{E}_{\boldsymbol{\theta}_u, \boldsymbol{\beta}_i} [\boldsymbol{\theta}_u^\top \boldsymbol{\beta}_i] &= \frac{a}{b} \int_{\theta, \Omega} \theta \nu(d\theta) H(d\omega) \\
 &= \frac{a}{b} \int_0^{\infty} \theta \nu(d\theta) \int_{\Omega} H(d\omega) \\
 &= \frac{a\alpha}{bc}
 \end{aligned} \tag{3}$$

## 2 Sparsity of the observation matrix

We compute the log-probability  $p(y_{ui} = 0)$  as

$$\begin{aligned}
 \log p(y_{ui} = 0) &= \log \left( \mathbb{E}_{\boldsymbol{\theta}_u, \boldsymbol{\beta}_i} \left[ \prod_{k=1}^{\infty} p(y_{uik} = 0 | \theta_{uk}, \beta_{ik}) \right] \right) \\
 &= \log \left( \mathbb{E}_{\boldsymbol{\theta}_u, \boldsymbol{\beta}_i} \left[ \prod_{k=1}^{\infty} e^{-\theta_{uk} \beta_{ik}} \right] \right) \\
 &\geq \mathbb{E}_{\boldsymbol{\theta}_u, \boldsymbol{\beta}_i} \left[ \log \left( \prod_{k=1}^{\infty} e^{-\theta_{uk} \beta_{ik}} \right) \right],
 \end{aligned} \tag{4}$$

where the last step follows from Jensen's inequality. Then, we can write:

$$\begin{aligned}
 \log p(y_{ui} = 0) &\geq \mathbb{E}_{\boldsymbol{\theta}_u} \left[ \sum_{k=1}^{\infty} \mathbb{E}_{\boldsymbol{\beta}_i} [-\theta_{uk} \beta_{ik}] \right] \\
 &= -\mathbb{E}_{\boldsymbol{\theta}_u} \left[ \sum_{k=1}^{\infty} \frac{a}{b} \theta_{uk} \right].
 \end{aligned} \tag{5}$$

Using the results in the previous section, this quantity is equal to  $-a\alpha/bc$ . Therefore, the expected number of zeros in the user behavior matrix is lower bounded by

$$\mathbb{E} \left[ \sum_{u=1}^N \sum_{i=1}^M \mathbb{I}\{y_{ui} = 0\} \right] \geq NM \exp\left(-\frac{a\alpha}{bc}\right). \tag{6}$$

( $\mathbb{I}\{\cdot\}$  is the indicator function).

## 3 Inference: Updates for $\tau_{uk}$

As detailed in the main text, the updates for the stick proportions  $\tau_{uk}$  are given by a quadratic equation of the form  $A_{uk}\tau_{uk}^2 + B_{uk}\tau_{uk} + C_{uk} = 0$ . Here we provide the specific equations for the coefficients  $A_{uk}$ ,  $B_{uk}$  and

$C_{uk}$ . First,

$$\begin{aligned} A_{uk} = & \mathbb{E}[s_u] \sum_{\ell=k+1}^T \tau_{u\ell} \left( \prod_{j=1, j \neq k}^{\ell-1} (1 - \tau_{uj}) \right) \\ & \times \left( \sum_{i=1}^M \mathbb{E}[\beta_{i\ell}] \right) \\ & - \mathbb{E}[s_u] \left( \prod_{j=1}^{k-1} (1 - \tau_{uj}) \right) \left( \sum_{i=1}^M \mathbb{E}[\beta_{ik}] \right) \\ & + \mathbb{E}[s_u] M \frac{a}{b} \prod_{j=1, j \neq k}^T (1 - \tau_{uj}). \end{aligned}$$

For  $B_{uk}$ , we have

$$B_{uk} = \alpha - 1 - C_{uk} - A_{uk} + \sum_{i=1}^M y_{ui} \left( 1 - \sum_{j=1}^k \phi_{ui,j} \right),$$

being

$$C_{uk} = - \sum_{i=1}^M y_{ui} \phi_{ui,k}.$$

#### 4 Hyperparameter selection for the MovieLens1M dataset

See Figure 1 for the results obtained on this database. The best performance is obtained with unit scale and any shape. We fix unit scale and shape for the rest of our experiments.

#### References

- Kingman, J. F. C. (1993). *Poisson processes* (Vol. 3). New York: The Clarendon Press Oxford University Press. (Oxford Science Publications)

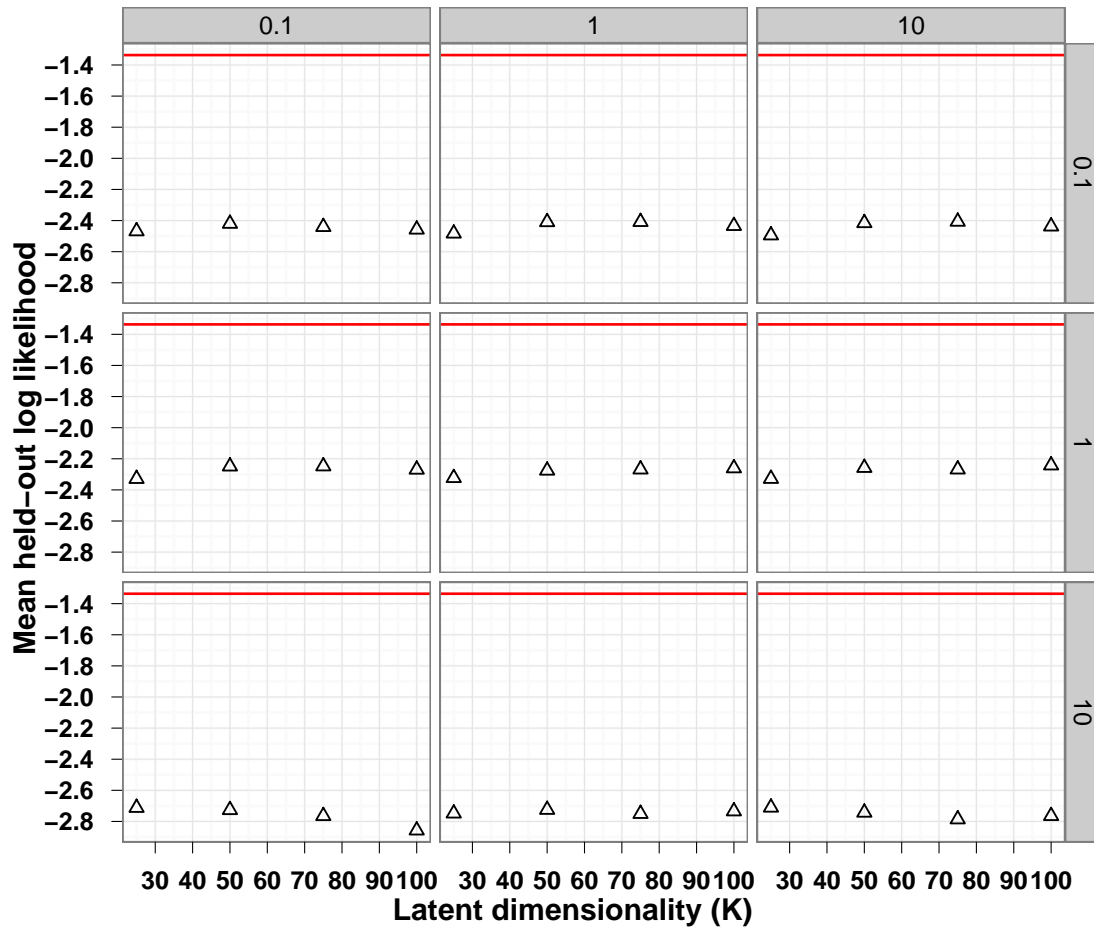

Figure 1: Mean held-out log-likelihood on the test set for the MovieLens1M dataset. The triangles show the performance of the finite model for varying values of  $K$ , while the horizontal lines show the performance of the BNPPF model. Each subfigure contains the results for a particular combination of the shape (top strip) and rate (right strip) Gamma hyperparameters of the user weights in the finite model.
